# Supplementary material
Source: ML conference proceedings conference paper supplement (https://openaccess.thecvf.com/content/WACV2025/html/Bhuiyan_Forensic_Iris_Image-Based_WACV_2025_paper.html)
Supplement: Supplementary file 1 [file Bhuiyan_Forensic_Iris_Image-Based_WACV_2025_supplemental.pdf]

## Forensic Iris Image-Based Post-Mortem Interval Estimation Supplementary Materials

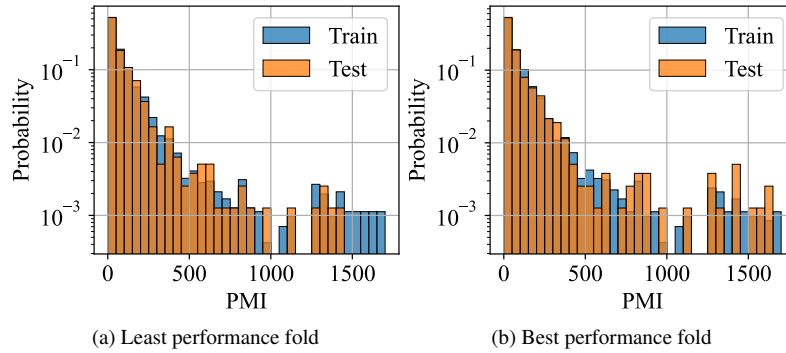

Figure A1. Comparison of the PMI distributions between training and test datasets for the least (a) and best (b) performing folds observed in the **sample-disjoint** 10-fold cross-validation for the **NIR data**.

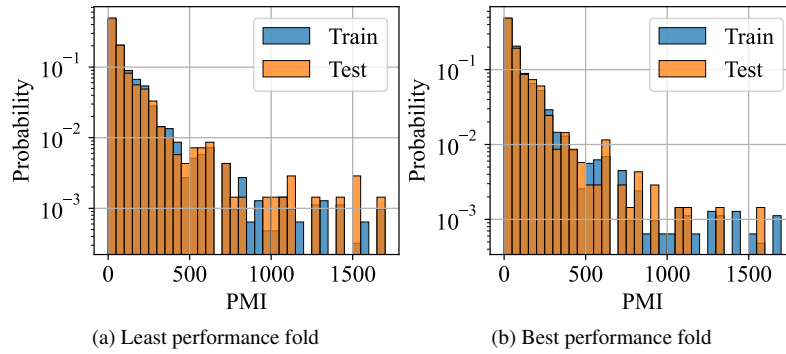

Figure A2. Same as in Fig. A1 but for **RGB data**.

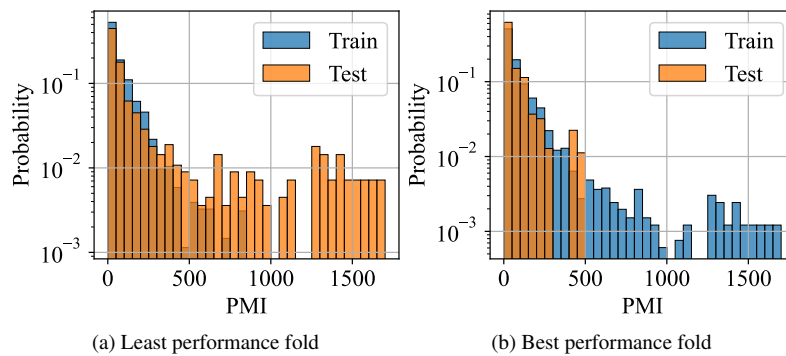

Figure A3. Comparison of the PMI distributions between training and test datasets for the least (a) and best (b) performing folds observed in the **subject-disjoint** 10-fold cross-validation for the **NIR data**.

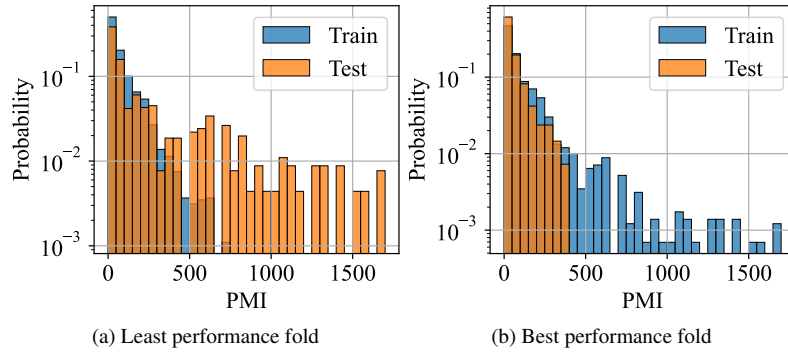

Figure A4. Same as in Fig. A3 but for RGB data.

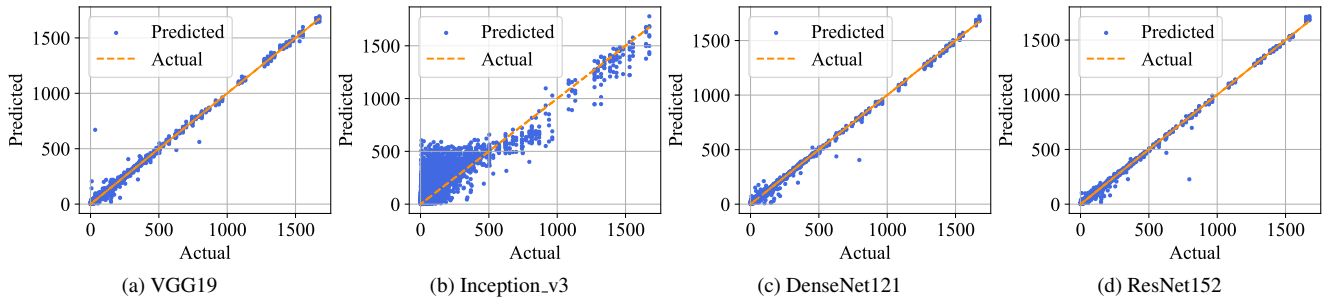

Figure A5. Scatter plots visualizing the predicted PMI values against the actual PMI values for NIR data combined for all sample-disjoint 10-fold cross-validations.

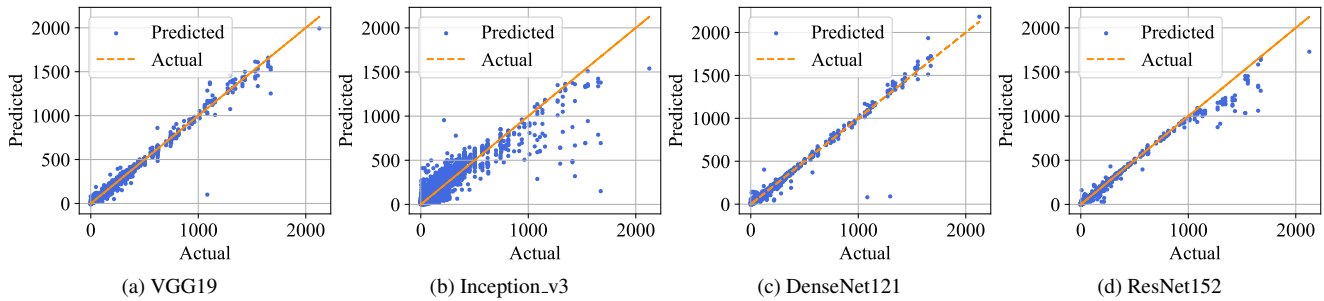

Figure A6. Scatter plots visualizing the predicted PMI values against the actual PMI values for RGB data combined for all sample-disjoint 10-fold cross-validations.

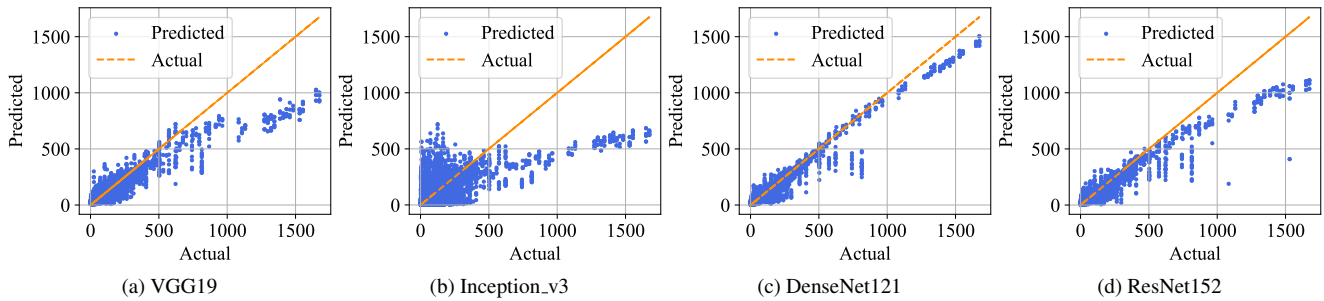

Figure A7. Scatter plots visualizing the predicted PMI values against the actual PMI values for NIR data combined for all subject-disjoint 10-fold cross-validations.

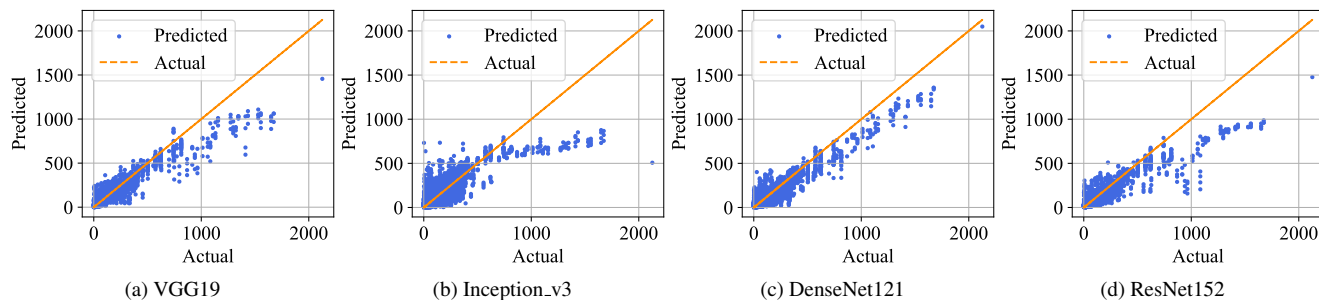

Figure A8. Scatter plots visualizing the predicted PMI values against the actual PMI values for **RGB data** combined for all **subject-disjoint** 10-fold cross-validations.

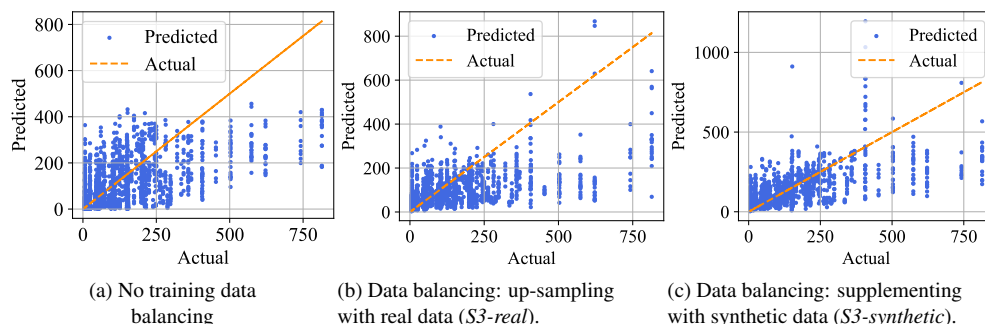

Figure A9. Scatter plots visualizing the predicted PMI values against the actual PMI values for **NIR data** by best performing model (Inception\_v3) trained on the NIJ dataset and **tested on the Warsaw dataset**.

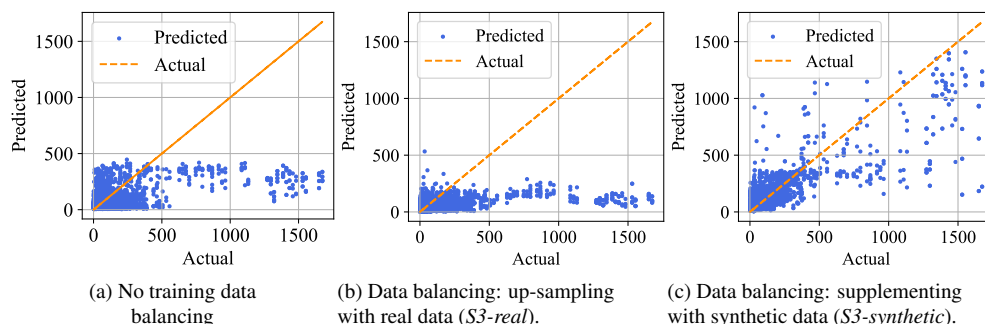

Figure A10. Scatter plots visualizing the predicted PMI values against the actual PMI values for **NIR data** by best performing model (Inception\_v3) trained on the Warsaw dataset and **tested on the NIJ dataset**.

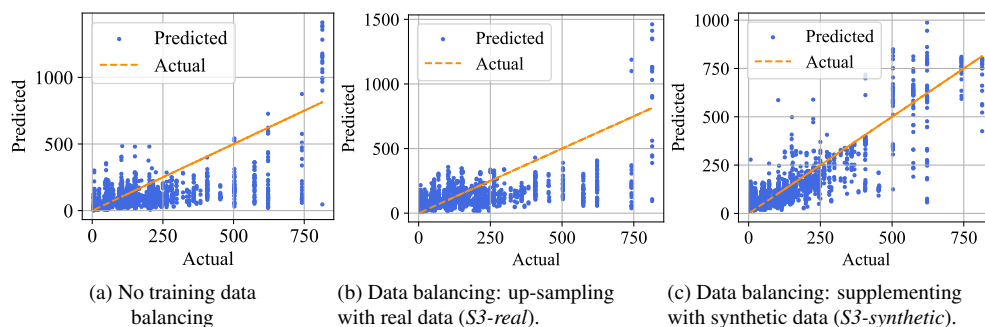

Figure A11. Scatter plots visualizing the predicted PMI values against the actual PMI values for **RGB data** by best performing model (Densenet121) trained on the NIJ dataset and **tested on the Warsaw dataset**.

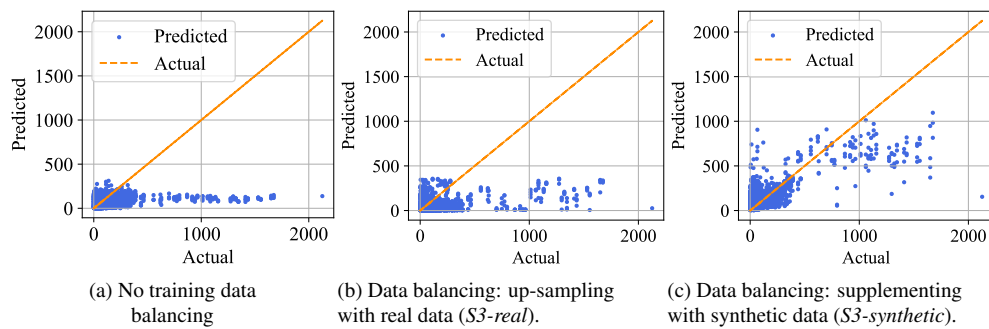

Figure A12. Scatter plots visualizing the predicted PMI values against the actual PMI values for **RGB data** by best performing model (Inception\_v3) trained on the Warsaw dataset and **tested on the NIJ dataset**.
